# Supplementary material
Source: publisher figshare collection journal article supplement (https://gsajournals.figshare.com/ndownloader/files/14393723)
Supplement: Supplementary file 1 [file 14393723]

## Sheet: test(1) copy
Supplemental Table S3: Genes annotated with enriched GO terms found in tetrasomic regions of the rainbow trout genome.
GOID	GO term	RBT gene ID	% sequence sim (between ohnologs)	Abbreviation	Function
GO:0001778	plasma membrane repair	CIGENEOMYV6.25092	98.04	CAV3	HUMANCaveolin-3
GO:0001778	plasma membrane repair	CIGENEOMYV6.42633	98.48	MYH10	HUMANMyosin-10
GO:0001778	plasma membrane repair	CIGENEOMYV6.42635	99.2	MYH10	HUMANMyosin-10
GO:0001778	plasma membrane repair	CIGENEOMYV6.44855	99.21	MYH10	HUMANMyosin-10
GO:0001778	plasma membrane repair	CIGENEOMYV6.44705	99.57	MYH11	CHICKMyosin-11
GO:0001778	plasma membrane repair	CIGENEOMYV6.42847	99.54	MYH9	CHICKMyosin-9
GO:0001778	plasma membrane repair	CIGENEOMYV6.44848	92.72	MYH9	MOUSEMyosin-9
GO:0001778	plasma membrane repair	CIGENEOMYV6.42575	97.91	MYOF	HUMANMyoferlin
GO:0001778	plasma membrane repair	CIGENEOMYV6.54548	82.98	MYOF	HUMANMyoferlin
GO:0001778	plasma membrane repair	CIGENEOMYV6.3851	100	MYSU	RABITMyosin
GO:0001778	plasma membrane repair	CIGENEOMYV6.4453	98.04	SYT11	RATSynaptotagmin-11
GO:0001778	plasma membrane repair	CIGENEOMYV6.48864	92.71	SYT11	HUMANSynaptotagmin-11
GO:0001778	plasma membrane repair	CIGENEOMYV6.24358	98.38	SYT2	RATSynaptotagmin-2
GO:0001778	plasma membrane repair	CIGENEOMYV6.32371	99.61	SYT2	RATSynaptotagmin-2
GO:0001778	plasma membrane repair	CIGENEOMYV6.22172	98.76	SYT7	HUMANSynaptotagmin-7
GO:0004030	aldehyde dehydrogenase [NAD(P)+] activity	CIGENEOMYV6.21948	99.04	AL1A2	HUMANRetinal
GO:0004030	aldehyde dehydrogenase [NAD(P)+] activity	CIGENEOMYV6.53108	98.62	AL1L1	XENLACytosolic
GO:0004030	aldehyde dehydrogenase [NAD(P)+] activity	CIGENEOMYV6.43205	99.79	AL3B1	HUMANAldehyde
GO:0004030	aldehyde dehydrogenase [NAD(P)+] activity	CIGENEOMYV6.4237	97.13	ALDH2	RATAldehyde
GO:0005344	oxygen transporter activity	CIGENEOMYV6.34674	91.76	CNKR2	MOUSEConnector
GO:0005344	oxygen transporter activity	CIGENEOMYV6.34762	97.24	CNKR2	MOUSEConnector
GO:0005344	oxygen transporter activity	CIGENEOMYV6.42896	95.51	CYGB1	ORYLACytoglobin-1
GO:0005344	oxygen transporter activity	CIGENEOMYV6.45068	95.14	CYGB2	ORYLACytoglobin-2
GO:0005344	oxygen transporter activity	CIGENEOMYV6.42803	95.83	HBA2	GOBGIHemoglobin
GO:0005344	oxygen transporter activity	CIGENEOMYV6.42805	84.72	HBA2	COTGOHemoglobin
GO:0005344	oxygen transporter activity	CIGENEOMYV6.42812	98.61	HBA4	ONCMYHemoglobin
GO:0005344	oxygen transporter activity	CIGENEOMYV6.42808	96.95	HBB	COTGOHemoglobin
GO:0005344	oxygen transporter activity	CIGENEOMYV6.42811	98.66	HBB	SALSAHemoglobin
GO:0005344	oxygen transporter activity	CIGENEOMYV6.67442	89.86	HBB2	BORSAHemoglobin
GO:0005344	oxygen transporter activity	CIGENEOMYV6.44661	81.72	MYG	AUXROMyoglobin
GO:0005344	oxygen transporter activity	CIGENEOMYV6.65498	94.38	NGB1	ONCMYNeuroglobin-1
GO:0005506	iron ion binding	CIGENEOMYV6.3058	91.24	ACOD	CYPCAAcyl-
GO:0005506	iron ion binding	CIGENEOMYV6.42700	99.71	ACON	RATAconitate
GO:0005506	iron ion binding	CIGENEOMYV6.17688	93.18	CALR	RATCalreticulin
GO:0005506	iron ion binding	CIGENEOMYV6.22232	97.51	CP1A1	ONCMYCytochrome
GO:0005506	iron ion binding	CIGENEOMYV6.23831	97.19	CP20A	HUMANCytochrome
GO:0005506	iron ion binding	CIGENEOMYV6.25878	90.52	CP24A	HUMAN1,25-dihydroxyvitamin
GO:0005506	iron ion binding	CIGENEOMYV6.2915	90.28	CP26A	DANRECytochrome
GO:0005506	iron ion binding	CIGENEOMYV6.22202	98.62	CP2R1	HUMANVitamin
GO:0005506	iron ion binding	CIGENEOMYV6.48773	97.02	CP51A	MACFALanosterol
GO:0005506	iron ion binding	CIGENEOMYV6.28519	95.52	CP7A1	HUMANCholesterol
GO:0005506	iron ion binding	CIGENEOMYV6.42896	95.51	CYGB1	ORYLACytoglobin-1
GO:0005506	iron ion binding	CIGENEOMYV6.45068	95.14	CYGB2	ORYLACytoglobin-2
GO:0005506	iron ion binding	CIGENEOMYV6.4762	81.69	ETHE1	MOUSEPersulfide
GO:0005506	iron ion binding	CIGENEOMYV6.12853	88.76	FBXL5	SALSAF-box
GO:0005506	iron ion binding	CIGENEOMYV6.42803	95.83	HBA2	GOBGIHemoglobin
GO:0005506	iron ion binding	CIGENEOMYV6.42805	84.72	HBA2	COTGOHemoglobin
GO:0005506	iron ion binding	CIGENEOMYV6.42812	98.61	HBA4	ONCMYHemoglobin
GO:0005506	iron ion binding	CIGENEOMYV6.42808	96.95	HBB	COTGOHemoglobin
GO:0005506	iron ion binding	CIGENEOMYV6.42811	98.66	HBB	SALSAHemoglobin
GO:0005506	iron ion binding	CIGENEOMYV6.67442	89.86	HBB2	BORSAHemoglobin
GO:0005506	iron ion binding	CIGENEOMYV6.42930	99.75	JMJD6	DANREBifunctional
GO:0005506	iron ion binding	CIGENEOMYV6.35779	95.47	KDM2A	HUMANLysine-specific
GO:0005506	iron ion binding	CIGENEOMYV6.50094	86.87	KDM2A	HUMANLysine-specific
GO:0005506	iron ion binding	CIGENEOMYV6.16745	88.37	KDM2B	MOUSELysine-specific
GO:0005506	iron ion binding	CIGENEOMYV6.49729	88.26	KDM3B	HUMANLysine-specific
GO:0005506	iron ion binding	CIGENEOMYV6.53451	96.74	KDM7B	DANRELysine-specific
GO:0005506	iron ion binding	CIGENEOMYV6.17639	94.55	NDUS7	BOVINNADH
GO:0005506	iron ion binding	CIGENEOMYV6.35774	99.05	NDUS8	BOVINNADH
GO:0005506	iron ion binding	CIGENEOMYV6.21144	89.56	NOS1	RATNitric
GO:0005506	iron ion binding	CIGENEOMYV6.23572	98.01	OTOMP	ONCMYOtolith
GO:0005506	iron ion binding	CIGENEOMYV6.24919	93.48	P3H1	RATProlyl
GO:0005506	iron ion binding	CIGENEOMYV6.54567	94.75	P4HA1	CHICKProlyl
GO:0005506	iron ion binding	CIGENEOMYV6.33966	94.25	P4HA2	CHICKProlyl
GO:0005506	iron ion binding	CIGENEOMYV6.53370	98.46	PH4H	RATPhenylalanine-4-hydroxylase
GO:0005506	iron ion binding	CIGENEOMYV6.32857	92.26	PHF8	DANREHistone
GO:0005506	iron ion binding	CIGENEOMYV6.34944	88.1	TMLH	CHICKTrimethyllysine
GO:0005506	iron ion binding	CIGENEOMYV6.22124	98.59	TPH	XENLATryptophan
GO:0005826	actomyosin contractile ring	CIGENEOMYV6.42633	98.48	MYH10	HUMANMyosin-10
GO:0005826	actomyosin contractile ring	CIGENEOMYV6.42635	99.2	MYH10	HUMANMyosin-10
GO:0005826	actomyosin contractile ring	CIGENEOMYV6.44855	99.21	MYH10	HUMANMyosin-10
GO:0005826	actomyosin contractile ring	CIGENEOMYV6.44705	99.57	MYH11	CHICKMyosin-11
GO:0005826	actomyosin contractile ring	CIGENEOMYV6.42847	99.54	MYH9	CHICKMyosin-9
GO:0005826	actomyosin contractile ring	CIGENEOMYV6.44848	92.72	MYH9	MOUSEMyosin-9
GO:0005826	actomyosin contractile ring	CIGENEOMYV6.3851	100	MYSU	RABITMyosin
GO:0005833	hemoglobin complex	CIGENEOMYV6.42803	95.83	HBA2	GOBGIHemoglobin
GO:0005833	hemoglobin complex	CIGENEOMYV6.42805	84.72	HBA2	COTGOHemoglobin
GO:0005833	hemoglobin complex	CIGENEOMYV6.42812	98.61	HBA4	ONCMYHemoglobin
GO:0005833	hemoglobin complex	CIGENEOMYV6.42808	96.95	HBB	COTGOHemoglobin
GO:0005833	hemoglobin complex	CIGENEOMYV6.42811	98.66	HBB	SALSAHemoglobin
GO:0005833	hemoglobin complex	CIGENEOMYV6.67442	89.86	HBB2	BORSAHemoglobin
GO:0005833	hemoglobin complex	CIGENEOMYV6.53427	97.33	NB5R3	MACFANADH-cytochrome
GO:0006958	complement activation, classical pathway	CIGENEOMYV6.4852	92.74	CO3	ONCMYComplement
GO:0006958	complement activation, classical pathway	CIGENEOMYV6.43227	80.87	HV343	HUMANImmunoglobulin
GO:0006958	complement activation, classical pathway	CIGENEOMYV6.53551	80.17	KV13	RABITIg
GO:0006958	complement activation, classical pathway	CIGENEOMYV6.53408	90.43	KV15	RABITIg
GO:0006958	complement activation, classical pathway	CIGENEOMYV6.53542	80	KV401	HUMANImmunoglobulin
GO:0007097	nuclear migration	CIGENEOMYV6.32399	99.48	CDC42	RATCell
GO:0007097	nuclear migration	CIGENEOMYV6.3973	99.48	CDC42	RATCell
GO:0007097	nuclear migration	CIGENEOMYV6.48993	99.48	CDC42	RATCell
GO:0007097	nuclear migration	CIGENEOMYV6.51073	97.67	DCTN4	MOUSEDynactin
GO:0007097	nuclear migration	CIGENEOMYV6.42633	98.48	MYH10	HUMANMyosin-10
GO:0007097	nuclear migration	CIGENEOMYV6.42635	99.2	MYH10	HUMANMyosin-10
GO:0007097	nuclear migration	CIGENEOMYV6.44855	99.21	MYH10	HUMANMyosin-10
GO:0007097	nuclear migration	CIGENEOMYV6.44705	99.57	MYH11	CHICKMyosin-11
GO:0007097	nuclear migration	CIGENEOMYV6.42847	99.54	MYH9	CHICKMyosin-9
GO:0007097	nuclear migration	CIGENEOMYV6.44848	92.72	MYH9	MOUSEMyosin-9
GO:0007097	nuclear migration	CIGENEOMYV6.3851	100	MYSU	RABITMyosin
GO:0007097	nuclear migration	CIGENEOMYV6.44704	97.27	NDE1	HUMANNuclear
GO:0007097	nuclear migration	CIGENEOMYV6.2437	97.1	RHOQ	HUMANRho-related
GO:0008635	activation of cysteine-type endopeptidase activity involved in apoptotic process cytochrome c	CIGENEOMYV6.53588	98.99	APAF	DANREApoptotic
GO:0008635	activation of cysteine-type endopeptidase activity involved in apoptotic process cytochrome c	CIGENEOMYV6.53590	97.81	APAF	DANREApoptotic
GO:0008635	activation of cysteine-type endopeptidase activity involved in apoptotic process cytochrome c	CIGENEOMYV6.21573	88.29	BAX	HUMANApoptosis
GO:0008635	activation of cysteine-type endopeptidase activity involved in apoptotic process cytochrome c	CIGENEOMYV6.42496	92.31	BAX	BOVINApoptosis
GO:0008635	activation of cysteine-type endopeptidase activity involved in apoptotic process cytochrome c	CIGENEOMYV6.35467	95.44	CASP3	RATCaspase-3
GO:0008635	activation of cysteine-type endopeptidase activity involved in apoptotic process cytochrome c	CIGENEOMYV6.75233	89.11	DBLOH	MOUSEDiablo
GO:0010248	establishment or maintenance of transmembrane electrochemical gradient	CIGENEOMYV6.23353	100	AT1A1	CATCOSodium
GO:0010248	establishment or maintenance of transmembrane electrochemical gradient	CIGENEOMYV6.29656	90.02	AT1A2	PIGSodium
GO:0010248	establishment or maintenance of transmembrane electrochemical gradient	CIGENEOMYV6.48975	99.1	AT1A3	OREMOSodium
GO:0010248	establishment or maintenance of transmembrane electrochemical gradient	CIGENEOMYV6.21573	88.29	BAX	HUMANApoptosis
GO:0010248	establishment or maintenance of transmembrane electrochemical gradient	CIGENEOMYV6.42496	92.31	BAX	BOVINApoptosis
GO:0010248	establishment or maintenance of transmembrane electrochemical gradient	CIGENEOMYV6.42633	98.48	MYH10	HUMANMyosin-10
GO:0010248	establishment or maintenance of transmembrane electrochemical gradient	CIGENEOMYV6.42635	99.2	MYH10	HUMANMyosin-10
GO:0010248	establishment or maintenance of transmembrane electrochemical gradient	CIGENEOMYV6.44855	99.21	MYH10	HUMANMyosin-10
GO:0010248	establishment or maintenance of transmembrane electrochemical gradient	CIGENEOMYV6.44705	99.57	MYH11	CHICKMyosin-11
GO:0010248	establishment or maintenance of transmembrane electrochemical gradient	CIGENEOMYV6.42847	99.54	MYH9	CHICKMyosin-9
GO:0010248	establishment or maintenance of transmembrane electrochemical gradient	CIGENEOMYV6.44848	92.72	MYH9	MOUSEMyosin-9
GO:0010248	establishment or maintenance of transmembrane electrochemical gradient	CIGENEOMYV6.3851	100	MYSU	RABITMyosin
GO:0010729	positive regulation of hydrogen peroxide biosynthetic process	CIGENEOMYV6.12994	86.25	GFI1	CANLFZinc
GO:0010729	positive regulation of hydrogen peroxide biosynthetic process	CIGENEOMYV6.35839	80.4	ZFP13	MOUSEZinc
GO:0010729	positive regulation of hydrogen peroxide biosynthetic process	CIGENEOMYV6.35826	81.61	ZN205	BOVINZinc
GO:0010729	positive regulation of hydrogen peroxide biosynthetic process	CIGENEOMYV6.35834	82.5	ZN551	HUMANZinc
GO:0010729	positive regulation of hydrogen peroxide biosynthetic process	CIGENEOMYV6.35822	89.69	ZO20	XENLAOocyte
GO:0010729	positive regulation of hydrogen peroxide biosynthetic process	CIGENEOMYV6.35825	85.11	ZO20	XENLAOocyte
GO:0010729	positive regulation of hydrogen peroxide biosynthetic process	CIGENEOMYV6.35888	81.76	ZO20	XENLAOocyte
GO:0010729	positive regulation of hydrogen peroxide biosynthetic process	CIGENEOMYV6.35814	80.72	ZSCA2	HUMANZinc
GO:0016705	oxidoreductase activity, acting on paired donors, with incorporation or reduction of oxygen	CIGENEOMYV6.23831	97.19	CP20A	HUMANCytochrome
GO:0016705	oxidoreductase activity, acting on paired donors, with incorporation or reduction of oxygen	CIGENEOMYV6.42429	96.2	SC65	HUMANSynaptonemal
GO:0019785	ISG15-specific protease activity	CIGENEOMYV6.42555	96.38	UBP31	HUMANUbiquitin
GO:0019785	ISG15-specific protease activity	CIGENEOMYV6.42876	96.59	UBP43	HUMANUbiquitin
GO:0019785	ISG15-specific protease activity	CIGENEOMYV6.42878	95.37	UBP43	HUMANUbiquitin
GO:0019785	ISG15-specific protease activity	CIGENEOMYV6.44872	92.76	UBP43	HUMANUbiquitin
GO:0019825	oxygen binding	CIGENEOMYV6.10946	92.21	CBS	MACFACystathionine
GO:0019825	oxygen binding	CIGENEOMYV6.22232	97.51	CP1A1	ONCMYCytochrome
GO:0019825	oxygen binding	CIGENEOMYV6.2356	88.62	CP1B1	MOUSECytochrome
GO:0019825	oxygen binding	CIGENEOMYV6.65614	84.67	CP1B1	HUMANCytochrome
GO:0019825	oxygen binding	CIGENEOMYV6.2915	90.28	CP26A	DANRECytochrome
GO:0019825	oxygen binding	CIGENEOMYV6.22202	98.62	CP2R1	HUMANVitamin
GO:0019825	oxygen binding	CIGENEOMYV6.4884	96.15	CP4B1	RATCytochrome
GO:0019825	oxygen binding	CIGENEOMYV6.29094	88.11	CP8B1	HUMAN7-alpha-hydroxycholest-4-en-3-one
GO:0019825	oxygen binding	CIGENEOMYV6.42896	95.51	CYGB1	ORYLACytoglobin-1
GO:0019825	oxygen binding	CIGENEOMYV6.45068	95.14	CYGB2	ORYLACytoglobin-2
GO:0019825	oxygen binding	CIGENEOMYV6.42803	95.83	HBA2	GOBGIHemoglobin
GO:0019825	oxygen binding	CIGENEOMYV6.42805	84.72	HBA2	COTGOHemoglobin
GO:0019825	oxygen binding	CIGENEOMYV6.42812	98.61	HBA4	ONCMYHemoglobin
GO:0019825	oxygen binding	CIGENEOMYV6.42808	96.95	HBB	COTGOHemoglobin
GO:0019825	oxygen binding	CIGENEOMYV6.42811	98.66	HBB	SALSAHemoglobin
GO:0019825	oxygen binding	CIGENEOMYV6.67442	89.86	HBB2	BORSAHemoglobin
GO:0019825	oxygen binding	CIGENEOMYV6.44661	81.72	MYG	AUXROMyoglobin
GO:0019825	oxygen binding	CIGENEOMYV6.65498	94.38	NGB1	ONCMYNeuroglobin-1
GO:0019825	oxygen binding	CIGENEOMYV6.50299	94.36	T23OA	DANRETryptophan
GO:0021592	fourth ventricle development	CIGENEOMYV6.35779	95.47	KDM2A	HUMANLysine-specific
GO:0021592	fourth ventricle development	CIGENEOMYV6.50094	86.87	KDM2A	HUMANLysine-specific
GO:0021592	fourth ventricle development	CIGENEOMYV6.16745	88.37	KDM2B	MOUSELysine-specific
GO:0021592	fourth ventricle development	CIGENEOMYV6.20330	89.22	KDM2B	XENLALysine-specific
GO:0021592	fourth ventricle development	CIGENEOMYV6.42633	98.48	MYH10	HUMANMyosin-10
GO:0021592	fourth ventricle development	CIGENEOMYV6.42635	99.2	MYH10	HUMANMyosin-10
GO:0021592	fourth ventricle development	CIGENEOMYV6.44855	99.21	MYH10	HUMANMyosin-10
GO:0021592	fourth ventricle development	CIGENEOMYV6.44705	99.57	MYH11	CHICKMyosin-11
GO:0021592	fourth ventricle development	CIGENEOMYV6.42847	99.54	MYH9	CHICKMyosin-9
GO:0021592	fourth ventricle development	CIGENEOMYV6.44848	92.72	MYH9	MOUSEMyosin-9
GO:0021592	fourth ventricle development	CIGENEOMYV6.3851	100	MYSU	RABITMyosin
GO:0021678	third ventricle development	CIGENEOMYV6.44771	98.04	DPCD	DANRE
GO:0021678	third ventricle development	CIGENEOMYV6.35779	95.47	KDM2A	HUMANLysine-specific
GO:0021678	third ventricle development	CIGENEOMYV6.50094	86.87	KDM2A	HUMANLysine-specific
GO:0021678	third ventricle development	CIGENEOMYV6.16745	88.37	KDM2B	MOUSELysine-specific
GO:0021678	third ventricle development	CIGENEOMYV6.20330	89.22	KDM2B	XENLALysine-specific
GO:0021678	third ventricle development	CIGENEOMYV6.42633	98.48	MYH10	HUMANMyosin-10
GO:0021678	third ventricle development	CIGENEOMYV6.42635	99.2	MYH10	HUMANMyosin-10
GO:0021678	third ventricle development	CIGENEOMYV6.44855	99.21	MYH10	HUMANMyosin-10
GO:0021678	third ventricle development	CIGENEOMYV6.44705	99.57	MYH11	CHICKMyosin-11
GO:0021678	third ventricle development	CIGENEOMYV6.42847	99.54	MYH9	CHICKMyosin-9
GO:0021678	third ventricle development	CIGENEOMYV6.44848	92.72	MYH9	MOUSEMyosin-9
GO:0021678	third ventricle development	CIGENEOMYV6.3851	100	MYSU	RABITMyosin
GO:0030220	platelet formation	CIGENEOMYV6.30749	98.16	ACTN3	MOUSEAlpha-actinin-3
GO:0030220	platelet formation	CIGENEOMYV6.35467	95.44	CASP3	RATCaspase-3
GO:0030220	platelet formation	CIGENEOMYV6.53170	98.87	FLNC	HUMANFilamin-C
GO:0030220	platelet formation	CIGENEOMYV6.24593	91.08	GATA2	XENLAGATA-binding
GO:0030220	platelet formation	CIGENEOMYV6.48841	91.21	MEF2D	XENLAMyocyte-specific
GO:0030220	platelet formation	CIGENEOMYV6.42633	98.48	MYH10	HUMANMyosin-10
GO:0030220	platelet formation	CIGENEOMYV6.42635	99.2	MYH10	HUMANMyosin-10
GO:0030220	platelet formation	CIGENEOMYV6.44855	99.21	MYH10	HUMANMyosin-10
GO:0030220	platelet formation	CIGENEOMYV6.44705	99.57	MYH11	CHICKMyosin-11
GO:0030220	platelet formation	CIGENEOMYV6.42847	99.54	MYH9	CHICKMyosin-9
GO:0030220	platelet formation	CIGENEOMYV6.44848	92.72	MYH9	MOUSEMyosin-9
GO:0030220	platelet formation	CIGENEOMYV6.3851	100	MYSU	RABITMyosin
GO:0030220	platelet formation	CIGENEOMYV6.31939	95.82	PTN11	CHICKTyrosine-
GO:0030220	platelet formation	CIGENEOMYV6.2970	96.22	SPTB2	HUMANSpectrin
GO:0030220	platelet formation	CIGENEOMYV6.15826	97.59	SPTN1	CHICKSpectrin
GO:0030220	platelet formation	CIGENEOMYV6.20546	97.99	VP33A	HUMANVacuolar
GO:0030220	platelet formation	CIGENEOMYV6.25635	95.72	WDR1	CHICKWD
GO:0030220	platelet formation	CIGENEOMYV6.4685	93.5	Z385D	HUMANZinc
GO:0030241	skeletal muscle myosin thick filament assembly	CIGENEOMYV6.42633	98.48	MYH10	HUMANMyosin-10
GO:0030241	skeletal muscle myosin thick filament assembly	CIGENEOMYV6.42635	99.2	MYH10	HUMANMyosin-10
GO:0030241	skeletal muscle myosin thick filament assembly	CIGENEOMYV6.44855	99.21	MYH10	HUMANMyosin-10
GO:0030241	skeletal muscle myosin thick filament assembly	CIGENEOMYV6.44705	99.57	MYH11	CHICKMyosin-11
GO:0030241	skeletal muscle myosin thick filament assembly	CIGENEOMYV6.42847	99.54	MYH9	CHICKMyosin-9
GO:0030241	skeletal muscle myosin thick filament assembly	CIGENEOMYV6.44848	92.72	MYH9	MOUSEMyosin-9
GO:0030241	skeletal muscle myosin thick filament assembly	CIGENEOMYV6.10889	89.29	MYO16	HUMANUnconventional
GO:0030241	skeletal muscle myosin thick filament assembly	CIGENEOMYV6.3851	100	MYSU	RABITMyosin
GO:0030241	skeletal muscle myosin thick filament assembly	CIGENEOMYV6.12865	82.41	PALLD	MOUSEPalladin
GO:0030241	skeletal muscle myosin thick filament assembly	CIGENEOMYV6.75745	94.48	ROBO2	MOUSERoundabout
GO:0030241	skeletal muscle myosin thick filament assembly	CIGENEOMYV6.4238	94.59	TELT	HUMANTelethonin
GO:0030241	skeletal muscle myosin thick filament assembly	CIGENEOMYV6.42414	96.67	TELT	BOVINTelethonin
GO:0030241	skeletal muscle myosin thick filament assembly	CIGENEOMYV6.10492	95.64	TITIN	MOUSETitin
GO:0030250	guanylate cyclase activator activity	CIGENEOMYV6.43099	84.01	RUN3A	DANRERUN
GO:0031449	regulation of slow-twitch skeletal muscle fiber contraction	CIGENEOMYV6.42633	98.48	MYH10	HUMANMyosin-10
GO:0031449	regulation of slow-twitch skeletal muscle fiber contraction	CIGENEOMYV6.42635	99.2	MYH10	HUMANMyosin-10
GO:0031449	regulation of slow-twitch skeletal muscle fiber contraction	CIGENEOMYV6.44855	99.21	MYH10	HUMANMyosin-10
GO:0031449	regulation of slow-twitch skeletal muscle fiber contraction	CIGENEOMYV6.44705	99.57	MYH11	CHICKMyosin-11
GO:0031449	regulation of slow-twitch skeletal muscle fiber contraction	CIGENEOMYV6.36679	97.52	MYH6	MOUSEMyosin-6
GO:0031449	regulation of slow-twitch skeletal muscle fiber contraction	CIGENEOMYV6.42847	99.54	MYH9	CHICKMyosin-9
GO:0032796	uropod organization	CIGENEOMYV6.43057	99.07	COR1A	HUMANCoronin-1A
GO:0032796	uropod organization	CIGENEOMYV6.31210	93.92	COR1B	MOUSECoronin-1B
GO:0032796	uropod organization	CIGENEOMYV6.20624	96.84	COR1C	HUMANCoronin-1C
GO:0032796	uropod organization	CIGENEOMYV6.42633	98.48	MYH10	HUMANMyosin-10
GO:0032796	uropod organization	CIGENEOMYV6.42635	99.2	MYH10	HUMANMyosin-10
GO:0032796	uropod organization	CIGENEOMYV6.44855	99.21	MYH10	HUMANMyosin-10
GO:0032796	uropod organization	CIGENEOMYV6.44705	99.57	MYH11	CHICKMyosin-11
GO:0032796	uropod organization	CIGENEOMYV6.42847	99.54	MYH9	CHICKMyosin-9
GO:0032796	uropod organization	CIGENEOMYV6.44848	92.72	MYH9	MOUSEMyosin-9
GO:0032796	uropod organization	CIGENEOMYV6.3851	100	MYSU	RABITMyosin
GO:0040023	establishment of nucleus localization	CIGENEOMYV6.44662	98.91	2018-09-03	DANRENeuronal-specific
GO:0040023	establishment of nucleus localization	CIGENEOMYV6.42875	98.67	NET1	PIGNetrin-1
GO:0040023	establishment of nucleus localization	CIGENEOMYV6.44863	98.75	NET1	CHICKNetrin-1
GO:0040023	establishment of nucleus localization	CIGENEOMYV6.54879	89.08	NET3	CHICKNetrin-3
GO:0040023	establishment of nucleus localization	CIGENEOMYV6.42919	94.87	NHRF1	RABITNa(+)
GO:0040023	establishment of nucleus localization	CIGENEOMYV6.67851	89.41	SLIT1	MOUSESlit
GO:0040023	establishment of nucleus localization	CIGENEOMYV6.49683	97.37	SLIT3	HUMANSlit
GO:0040023	establishment of nucleus localization	CIGENEOMYV6.49686	96.25	SLIT3	RATSlit
GO:0043495	protein anchor	CIGENEOMYV6.30749	98.16	ACTN3	MOUSEAlpha-actinin-3
GO:0043495	protein anchor	CIGENEOMYV6.37708	91.85	B3A2	HUMANAnion
GO:0043495	protein anchor	CIGENEOMYV6.43132	97.82	B3AT	ONCMYBand
GO:0043495	protein anchor	CIGENEOMYV6.23689	98.21	GRAN	MOUSEGrancalcin
GO:0043495	protein anchor	CIGENEOMYV6.42633	98.48	MYH10	HUMANMyosin-10
GO:0043495	protein anchor	CIGENEOMYV6.42635	99.2	MYH10	HUMANMyosin-10
GO:0043495	protein anchor	CIGENEOMYV6.44855	99.21	MYH10	HUMANMyosin-10
GO:0043495	protein anchor	CIGENEOMYV6.44705	99.57	MYH11	CHICKMyosin-11
GO:0043495	protein anchor	CIGENEOMYV6.42847	99.54	MYH9	CHICKMyosin-9
GO:0043495	protein anchor	CIGENEOMYV6.44848	92.72	MYH9	MOUSEMyosin-9
GO:0043495	protein anchor	CIGENEOMYV6.3851	100	MYSU	RABITMyosin
GO:0043495	protein anchor	CIGENEOMYV6.36708	91.84	PDCD6	MOUSEProgrammed
GO:0043495	protein anchor	CIGENEOMYV6.12930	84.79	TPR	HUMANNucleo
GO:0048172	regulation of short-term neuronal synaptic plasticity	CIGENEOMYV6.24465	90.54	GLRK	XENLAGlutamate
GO:0048172	regulation of short-term neuronal synaptic plasticity	CIGENEOMYV6.50649	81.4	GRIA1	MACFAGlutamate
GO:0048172	regulation of short-term neuronal synaptic plasticity	CIGENEOMYV6.50304	98.55	GRIA2	PONABGlutamate
GO:0048172	regulation of short-term neuronal synaptic plasticity	CIGENEOMYV6.34693	97.59	GRIA3	HUMANGlutamate
GO:0048172	regulation of short-term neuronal synaptic plasticity	CIGENEOMYV6.34204	99.61	GRIA4	MOUSEGlutamate
GO:0048172	regulation of short-term neuronal synaptic plasticity	CIGENEOMYV6.54554	96.33	GRID1	HUMANGlutamate
GO:0048172	regulation of short-term neuronal synaptic plasticity	CIGENEOMYV6.13659	96.67	GRIK2	HUMANGlutamate
GO:0048172	regulation of short-term neuronal synaptic plasticity	CIGENEOMYV6.4233	99.73	GRIK2	MOUSEGlutamate
GO:0048172	regulation of short-term neuronal synaptic plasticity	CIGENEOMYV6.4272	100	GRIK2	HUMANGlutamate
GO:0048172	regulation of short-term neuronal synaptic plasticity	CIGENEOMYV6.4869	98.68	GRIK3	MACFAGlutamate
GO:0048172	regulation of short-term neuronal synaptic plasticity	CIGENEOMYV6.74612	99.32	GRIK4	HUMANGlutamate
GO:0048172	regulation of short-term neuronal synaptic plasticity	CIGENEOMYV6.48987	90.57	GRIK5	RATGlutamate
GO:0048172	regulation of short-term neuronal synaptic plasticity	CIGENEOMYV6.4167	93.52	KMT2B	HUMANHistone-lysine
GO:0048172	regulation of short-term neuronal synaptic plasticity	CIGENEOMYV6.53438	99.51	LIPA2	MOUSELiprin-alpha-2
GO:0048172	regulation of short-term neuronal synaptic plasticity	CIGENEOMYV6.3006	97.06	NAC1	CANLFSodium
GO:0048172	regulation of short-term neuronal synaptic plasticity	CIGENEOMYV6.34978	95.34	NAC1	CANLFSodium
GO:0048172	regulation of short-term neuronal synaptic plasticity	CIGENEOMYV6.45383	96.2	NAC1	CAVPOSodium
GO:0048172	regulation of short-term neuronal synaptic plasticity	CIGENEOMYV6.42623	97.77	RAB3D	MOUSERas-related
GO:0048172	regulation of short-term neuronal synaptic plasticity	CIGENEOMYV6.42583	98.02	SHA9B	DANRE
GO:0048172	regulation of short-term neuronal synaptic plasticity	CIGENEOMYV6.42969	99.75	SHSA6	HUMAN
GO:0048172	regulation of short-term neuronal synaptic plasticity	CIGENEOMYV6.42719	87.08	SHSA8	HUMAN
GO:0048172	regulation of short-term neuronal synaptic plasticity	CIGENEOMYV6.42201	96.61	SNG1	RATSynaptogyrin-1
GO:0048172	regulation of short-term neuronal synaptic plasticity	CIGENEOMYV6.32473	97.29	SYPH	SPECISynaptophysin
GO:0048172	regulation of short-term neuronal synaptic plasticity	CIGENEOMYV6.22377	100	UN13C	MOUSE
GO:0050665	hydrogen peroxide biosynthetic process	CIGENEOMYV6.11201	92.79	AOF	ONCMYAmine
GO:0051295	establishment of meiotic spindle localization	CIGENEOMYV6.42633	98.48	MYH10	HUMANMyosin-10
GO:0051295	establishment of meiotic spindle localization	CIGENEOMYV6.42635	99.2	MYH10	HUMANMyosin-10
GO:0051295	establishment of meiotic spindle localization	CIGENEOMYV6.44855	99.21	MYH10	HUMANMyosin-10
GO:0051295	establishment of meiotic spindle localization	CIGENEOMYV6.44705	99.57	MYH11	CHICKMyosin-11
GO:0051295	establishment of meiotic spindle localization	CIGENEOMYV6.42847	99.54	MYH9	CHICKMyosin-9
GO:0051295	establishment of meiotic spindle localization	CIGENEOMYV6.44848	92.72	MYH9	MOUSEMyosin-9
GO:0051295	establishment of meiotic spindle localization	CIGENEOMYV6.3851	100	MYSU	RABITMyosin
GO:0051295	establishment of meiotic spindle localization	CIGENEOMYV6.4361	90.47	SPIR1	HUMAN
GO:0060283	negative regulation of oocyte development	CIGENEOMYV6.53363	97.88	IGF1	ONCKIInsulin-like
GO:0070602	regulation of centromeric sister chromatid cohesion	CIGENEOMYV6.42527	91.05	AXIN1	DANREAxin-1
GO:0070602	regulation of centromeric sister chromatid cohesion	CIGENEOMYV6.45105	86.93	AXIN2	DANREAxin-2
GO:0070602	regulation of centromeric sister chromatid cohesion	CIGENEOMYV6.21980	97.28	CTCF	MOUSETranscriptional
GO:0070602	regulation of centromeric sister chromatid cohesion	CIGENEOMYV6.42332	99.56	PLAK	XENLAJunction
GO:0070602	regulation of centromeric sister chromatid cohesion	CIGENEOMYV6.44986	96.67	PLAK	XENLAJunction
GO:0070989	oxidative demethylation	CIGENEOMYV6.22232	97.51	CP1A1	ONCMYCytochrome
GO:0070989	oxidative demethylation	CIGENEOMYV6.2356	88.62	CP1B1	MOUSECytochrome
GO:0070989	oxidative demethylation	CIGENEOMYV6.45181	89.16	CP2DE	BOVINCytochrome
GO:0070989	oxidative demethylation	CIGENEOMYV6.22202	98.62	CP2R1	HUMANVitamin
GO:0090662	ATP hydrolysis coupled transmembrane transport	CIGENEOMYV6.42633	98.48	MYH10	HUMANMyosin-10
GO:0090662	ATP hydrolysis coupled transmembrane transport	CIGENEOMYV6.42635	99.2	MYH10	HUMANMyosin-10
GO:0090662	ATP hydrolysis coupled transmembrane transport	CIGENEOMYV6.44855	99.21	MYH10	HUMANMyosin-10
GO:0090662	ATP hydrolysis coupled transmembrane transport	CIGENEOMYV6.44705	99.57	MYH11	CHICKMyosin-11
GO:0090662	ATP hydrolysis coupled transmembrane transport	CIGENEOMYV6.42847	99.54	MYH9	CHICKMyosin-9
GO:0090662	ATP hydrolysis coupled transmembrane transport	CIGENEOMYV6.44848	92.72	MYH9	MOUSEMyosin-9
GO:0090662	ATP hydrolysis coupled transmembrane transport	CIGENEOMYV6.3851	100	MYSU	RABITMyosin
GO:1903918	regulation of actin filament severing	CIGENEOMYV6.3074	93.33	CRIP2	MOUSECysteine-rich
GO:1903918	regulation of actin filament severing	CIGENEOMYV6.64946	80.68	CRIP2	MOUSECysteine-rich
GO:1903919	negative regulation of actin filament severing	CIGENEOMYV6.24363	95.85	CSRP1	RATCysteine
GO:1903919	negative regulation of actin filament severing	CIGENEOMYV6.42633	98.48	MYH10	HUMANMyosin-10
GO:1903919	negative regulation of actin filament severing	CIGENEOMYV6.42635	99.2	MYH10	HUMANMyosin-10
GO:1903919	negative regulation of actin filament severing	CIGENEOMYV6.44855	99.21	MYH10	HUMANMyosin-10
GO:1903919	negative regulation of actin filament severing	CIGENEOMYV6.44705	99.57	MYH11	CHICKMyosin-11
GO:1903919	negative regulation of actin filament severing	CIGENEOMYV6.42847	99.54	MYH9	CHICKMyosin-9
GO:1903919	negative regulation of actin filament severing	CIGENEOMYV6.44848	92.72	MYH9	MOUSEMyosin-9
GO:1903919	negative regulation of actin filament severing	CIGENEOMYV6.3851	100	MYSU	RABITMyosin
GO:1903923	positive regulation of protein processing in phagocytic vesicle	CIGENEOMYV6.48541	93.13	ADSV	MOUSEAdseverin
GO:1903923	positive regulation of protein processing in phagocytic vesicle	CIGENEOMYV6.13003	91.69	GELS	CHICKGelsolin
GO:1903923	positive regulation of protein processing in phagocytic vesicle	CIGENEOMYV6.16604	95.14	GELS	HUMANGelsolin
GO:1903923	positive regulation of protein processing in phagocytic vesicle	CIGENEOMYV6.28327	94.75	GELS	CHICKGelsolin
GO:1903923	positive regulation of protein processing in phagocytic vesicle	CIGENEOMYV6.53296	96.99	GELS	CHICKGelsolin
GO:1903923	positive regulation of protein processing in phagocytic vesicle	CIGENEOMYV6.42633	98.48	MYH10	HUMANMyosin-10
GO:1903923	positive regulation of protein processing in phagocytic vesicle	CIGENEOMYV6.42635	99.2	MYH10	HUMANMyosin-10
GO:1903923	positive regulation of protein processing in phagocytic vesicle	CIGENEOMYV6.44855	99.21	MYH10	HUMANMyosin-10
GO:1903923	positive regulation of protein processing in phagocytic vesicle	CIGENEOMYV6.44705	99.57	MYH11	CHICKMyosin-11
GO:1903923	positive regulation of protein processing in phagocytic vesicle	CIGENEOMYV6.42847	99.54	MYH9	CHICKMyosin-9
GO:1903923	positive regulation of protein processing in phagocytic vesicle	CIGENEOMYV6.44848	92.72	MYH9	MOUSEMyosin-9
GO:1903923	positive regulation of protein processing in phagocytic vesicle	CIGENEOMYV6.3851	100	MYSU	RABITMyosin
GO:1904707	positive regulation of vascular smooth muscle cell proliferation	CIGENEOMYV6.23568	98.01	ACVR1	CHICKActivin
GO:1904707	positive regulation of vascular smooth muscle cell proliferation	CIGENEOMYV6.2568	94.75	BMR1A	RATBone
GO:1904707	positive regulation of vascular smooth muscle cell proliferation	CIGENEOMYV6.42845	99.07	DX39A	MOUSEATP-dependent
GO:1904707	positive regulation of vascular smooth muscle cell proliferation	CIGENEOMYV6.44925	99.71	DX39A	MOUSEATP-dependent
GO:1904707	positive regulation of vascular smooth muscle cell proliferation	CIGENEOMYV6.22326	100	MMP2	HUMAN72
GO:1904707	positive regulation of vascular smooth muscle cell proliferation	CIGENEOMYV6.14026	90.18	MPRI	HUMANCation-independent
GO:1904707	positive regulation of vascular smooth muscle cell proliferation	CIGENEOMYV6.42180	92.52	PDGFB	CANLFPlatelet-derived
GO:1904707	positive regulation of vascular smooth muscle cell proliferation	CIGENEOMYV6.10008	96.25	TGFR1	RATTGF-beta
